# Supplementary material for: Verteporfin inhibits YAP-induced bladder cancer cell growth and invasion via Hippo signaling pathway
Source: PubMed Central journal article supplement — Int J Med Sci. 2018 Apr 3;15(6):645–52. doi: 10.7150/ijms.23460 (PMC5930467; doi:10.7150/ijms.23460), 2018-04-03
Supplement: ijmsv15p0645s1.pdf [file ijmsv15p0645s1.pdf]

## Supplementary Material

5637

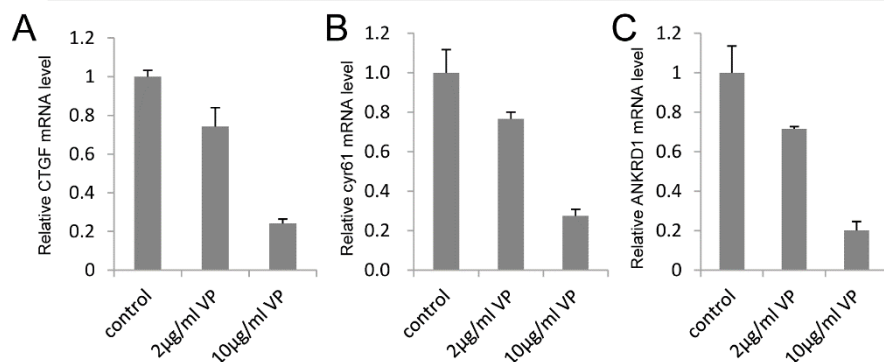

**Fig. S1 VP represses the target genes' expression of Hippo signaling pathway in 5637 cell.**

(A-C) qPCR to check the expression level of target genes (*CTGF*, *cyr61* and *ANKRD1*) of the Hippo pathway in 5637 cells and each sample was repeated three times for qPCR assay. 5637 cells were treated by DMSO, 2 µg/ml VP or 10 µg/ml VP respectively.

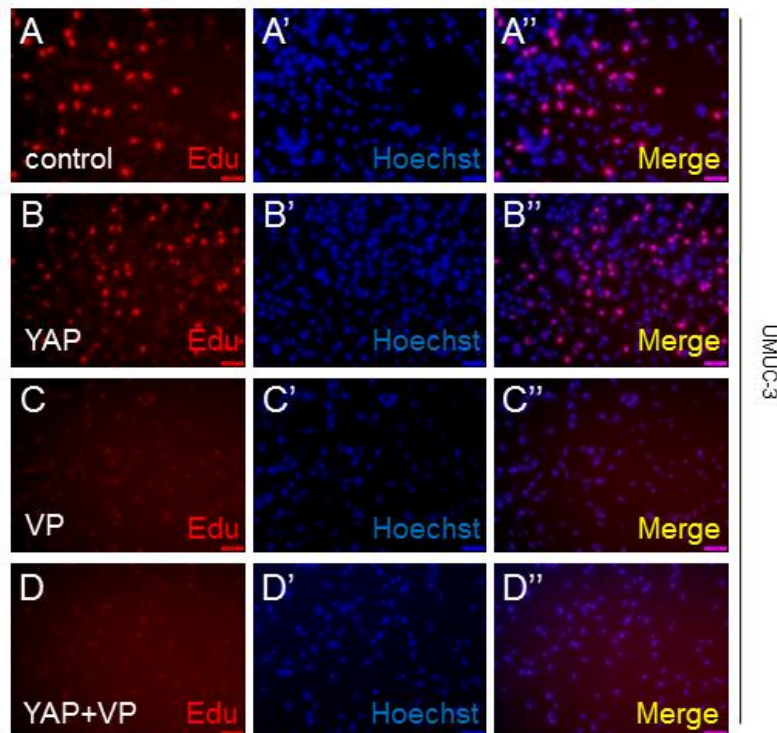

**Fig. S2 VP inhibits YAP induced bladder cancer UMUC-3 cell growth.**

(A-D) UMUC-3 cell proliferation after being transfected or/and treated by YAP or/and VP (10 µg/ml) is measured by Edu staining assay.

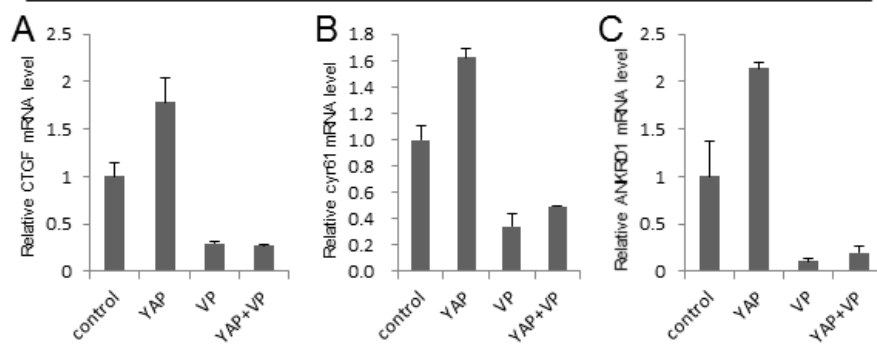

**Fig. S3 VP inhibits YAP induced Hippo pathway target genes' expression in 5637 cell.**

(A-C) qPCR to check the expression level of target genes (*CTGF*, *cyr61* and *ANKRD1*) of the Hippo pathway in 5637 cells and each sample was repeated three times for qPCR assay. 5637 bladder cancer cells were transfected or/and treated by YAP or/and VP (10  $\mu$ g/ml).
